# Supplementary material for: An inducible glycogen synthase-1 knockout halts but does not reverse Lafora disease progression in mice
Source: PubMed Central journal article supplement (PMC7857511; doi:10.1074/jbc.ra120.015773), 2020-12-10
Supplement: mmc1.pdf [file mmc1.pdf]

## **An inducible glycogen synthase-1 knockout halts but does not reverse Lafora disease progression in mice**

Silvia Nitschke Ph.D.<sup>1,2,4</sup>, Erin E. Chown M.Sc.<sup>2,4</sup>, Xiaochu Zhao B.Sc.<sup>2</sup>, Shoghig Gabrielian B.Sc.<sup>2</sup>, Dikran R. Guisso<sup>1</sup>, Sara Petković B.Sc.<sup>2</sup>, Ami M. Perri M.Sc.<sup>2</sup>, Peixiang Wang Ph.D.<sup>2</sup>, Saija J. Ahonen Ph.D.<sup>2</sup>, Felix Nitschke Ph.D.<sup>1,3,5</sup>, Berge A. Minassian M.D.<sup>1,2,5</sup>

<sup>1</sup>Division of Neurology, Department of Pediatrics, University of Texas Southwestern Medical Center, Dallas, TX 75390, USA

<sup>2</sup>Program in Genetics and Genome Biology, The Hospital for Sick Children Research Institute, Toronto, ON M5G 0A4, Canada

<sup>3</sup>Department of Biochemistry, University of Texas Southwestern Medical Center, Dallas, TX 75390, USA

<sup>4</sup>These authors contributed equally

<sup>5</sup>Co-corresponding authors

### **Supporting information – material included:**

Fig. S1

Fig. S2

Fig. S3

Fig. S4

Fig. S5

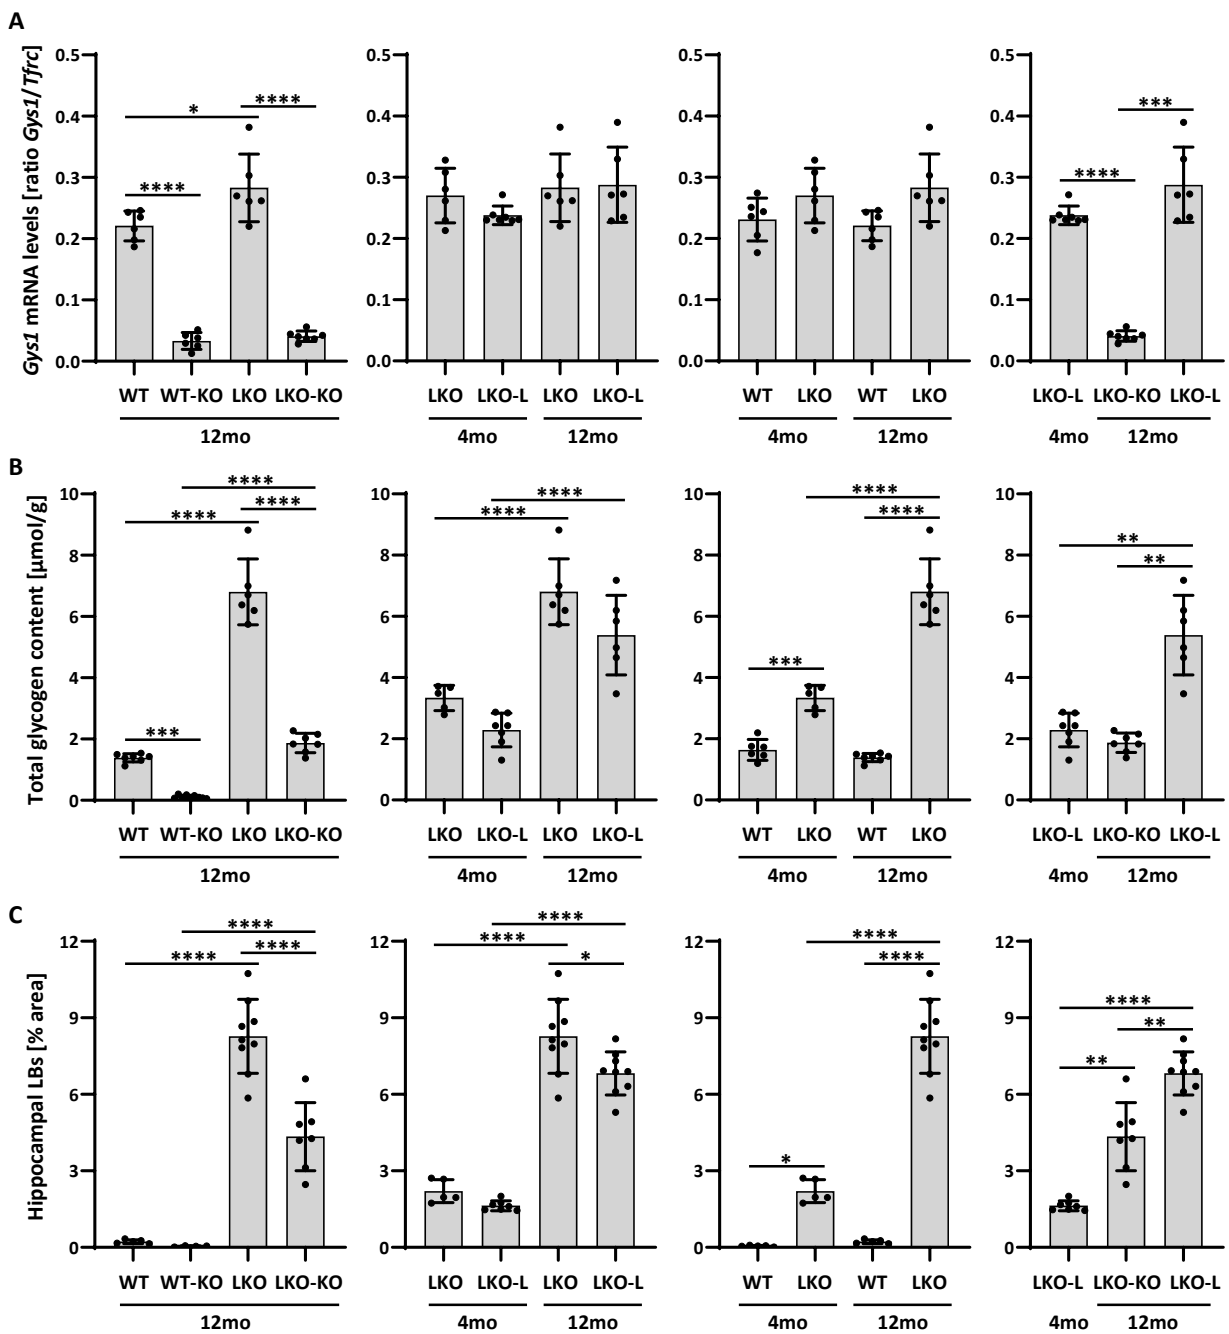

**Figure S1.** Follow-up statistical testing for *Gys1* mRNA levels (A), total glycogen content (B), and Lafora body (LB) quantification (C) in the brain. Two-way ANOVA for *Gys1* and *Epm2a* genotype (column 1), potential tamoxifen (TAM)-independent Cre recombination (Cre leakage) and age (column 2), and *Epm2a* genotype and age (column 3) as well as Welch's one-way ANOVA for TAM effect in isogenic mice (column 4). Error bars indicate SD.  $p < 0.05$  \*,  $p < 0.01$  \*\*,  $p < 0.001$  \*\*\*,  $p < 0.0001$  \*\*\*\*. Corresponding figure in the main text is Fig. 2.

A

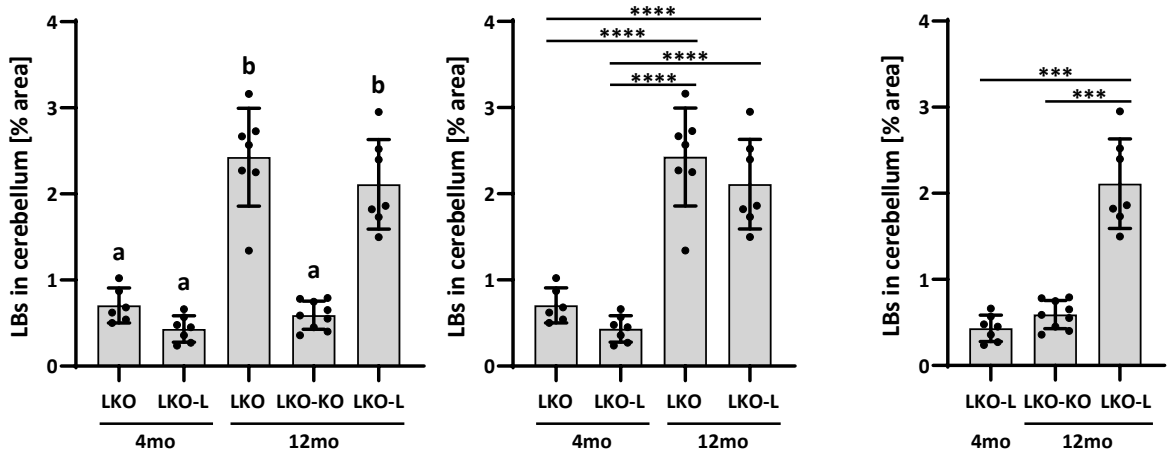

B

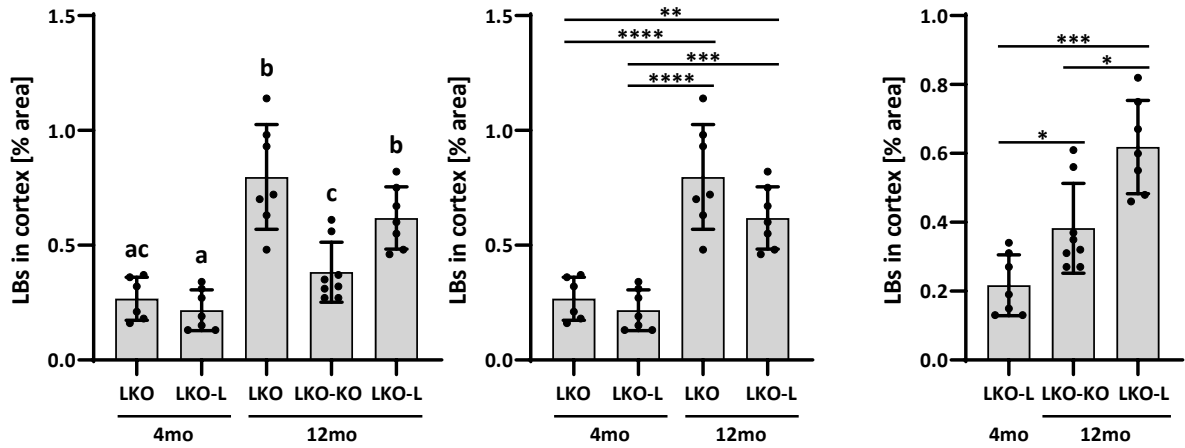

C

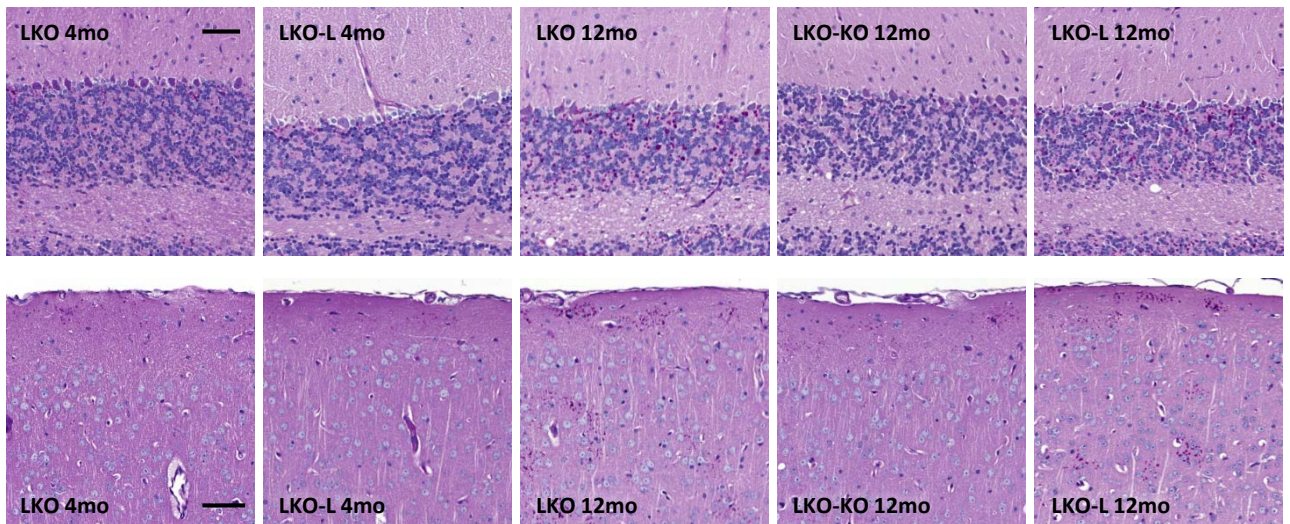

**Figure S2.** Lafora body quantification in cerebellum (A) and cortex (B). Error bars indicate SD. Statistical significance ( $p < 0.05$ ) is denoted by different letters (column 1, Welch's one-way ANOVA), while lack of significance is reflected by at least one shared letter. Where applicable, subsets of experimental groups underwent secondary follow-up statistical testing, using two-way ANOVA for potential tamoxifen (TAM)-independent Cre recombination (Cre leakage) and age (column 2) and Welch's one-way ANOVA for TAM effect in isogenic mice (column 3).  $p < 0.05$  \*,  $p < 0.01$  \*\*,  $p < 0.001$  \*\*\*,  $p < 0.0001$  \*\*\*\*. C, Representative images of PASD stained cerebellum (top) and cortex (bottom). Scale bar: 50  $\mu\text{m}$ .

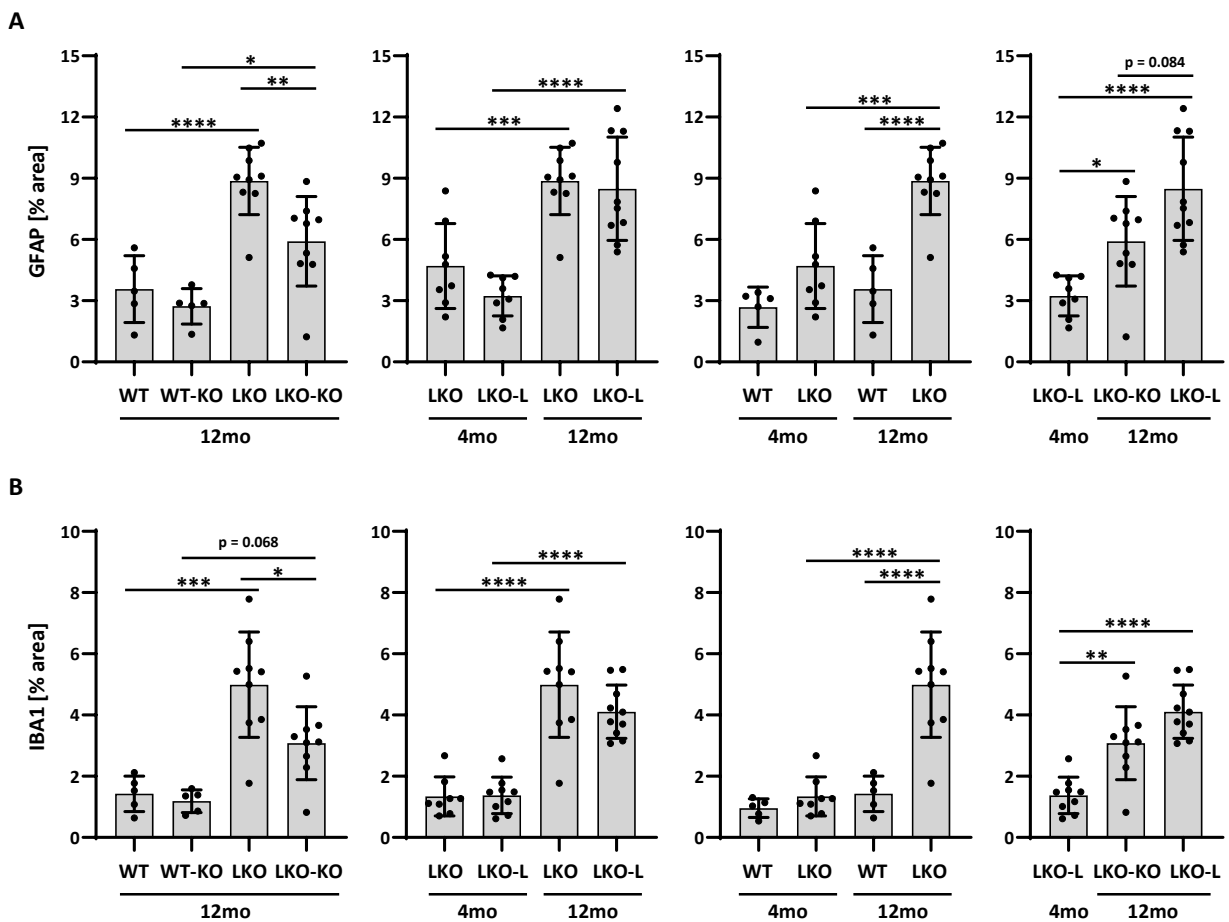

**Figure S3.** Follow-up statistical testing for GFAP (A) and IBA1 (B) immunohistochemical analysis in the hippocampus. Two-way ANOVA for *Gys1* and *Epm2a* genotype (column 1), potential tamoxifen (TAM)-independent Cre recombination (Cre leakage) and age (column 2), and *Epm2a* genotype status and age (column 3) as well as Welch's one-way ANOVA for TAM effect in isogenic mice (column 4). Error bars indicate SD.  $p < 0.05$  \*,  $p < 0.01$  \*\*,  $p < 0.001$  \*\*\*,  $p < 0.0001$  \*\*\*\*. Corresponding figure in the main text is Fig. 3.

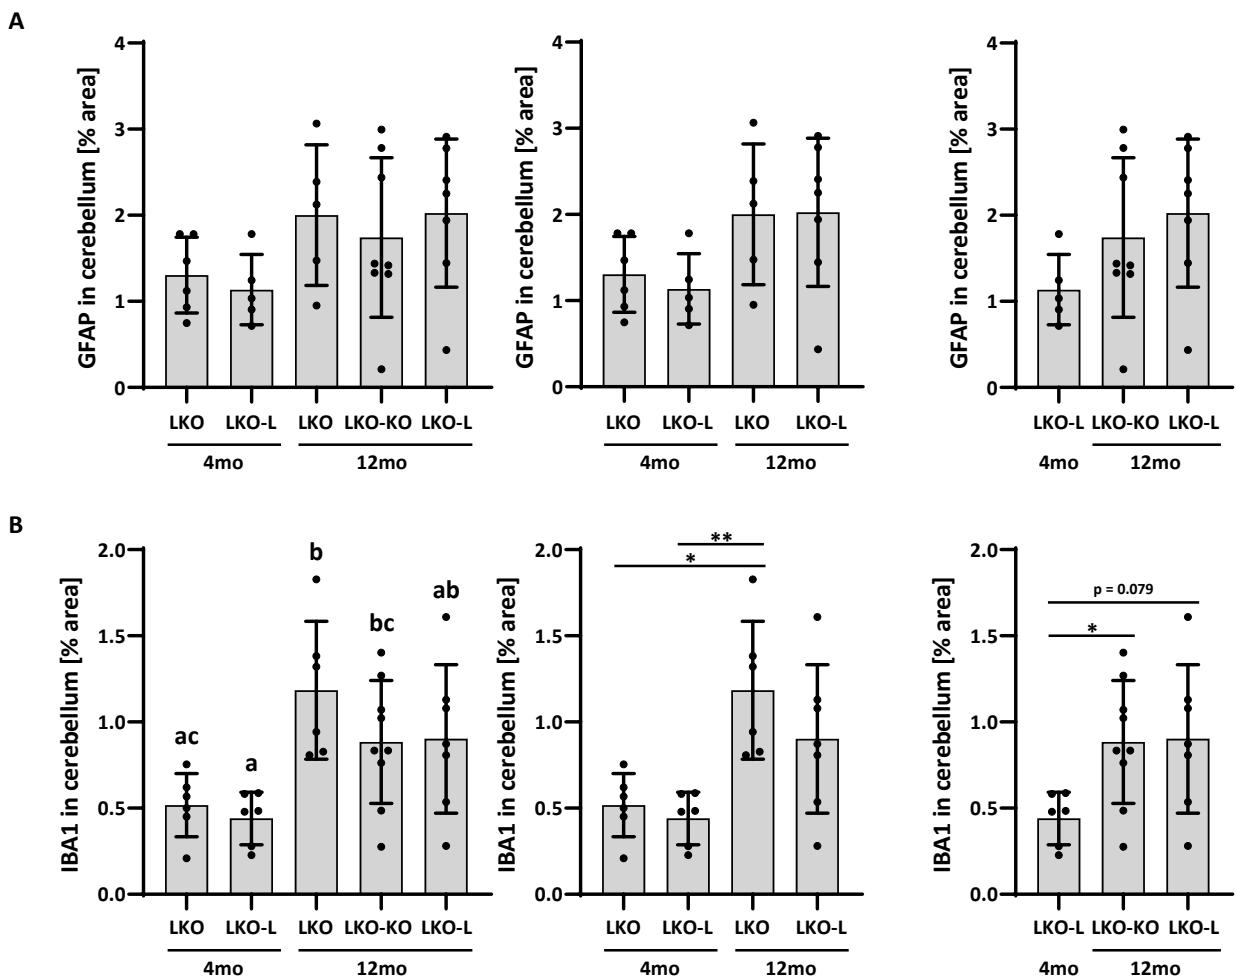

**Figure S4.** Quantification of GFAP (A) and IBA1 (B) immunohistochemical stain in cerebellum. Error bars indicate SD. Statistical significance ( $p < 0.05$ ) is denoted by different letters (column 1, Welch's one-way ANOVA), while lack of significance is reflected by at least one shared letter. Where applicable, subsets of experimental groups underwent secondary follow-up statistical testing, using two-way ANOVA for potential tamoxifen (TAM)-independent Cre recombination (Cre leakage) and age (column 2) and Welch's one-way ANOVA for TAM effect in isogenic mice (column 3).  $p < 0.05$  \*,  $p < 0.01$  \*\*.

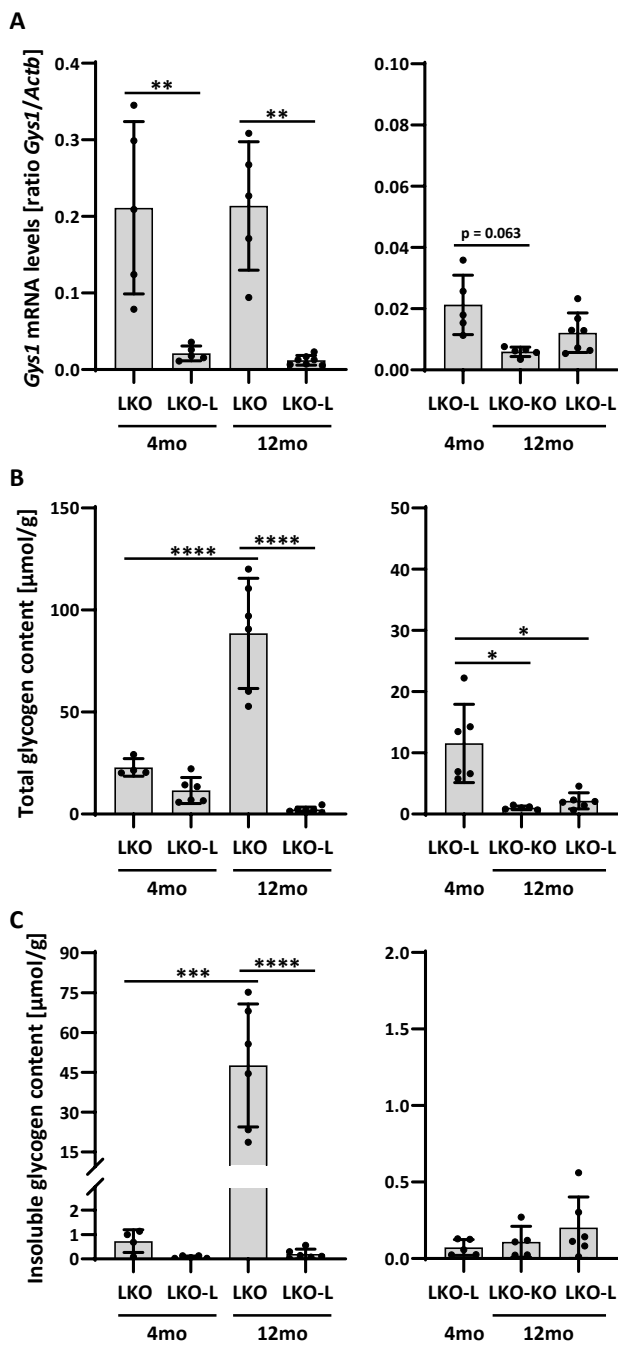

**Figure S5.** Follow-up statistical testing for *Gys1* mRNA levels (A), total glycogen content (B), and insoluble glycogen analyses (C) in the muscle. Two-way ANOVA for potential tamoxifen (TAM)-independent Cre recombination (Cre leakage) and age (column 1) and Welch's one-way ANOVA for TAM effect in isogenic mice (column 2). Error bars indicate SD.  $p < 0.05$  \*,  $p < 0.01$  \*\*,  $p < 0.001$  \*\*\*,  $p < 0.0001$  \*\*\*\*. Corresponding figure in the main text is Fig. 4.
